# Supplementary material for: Early Failure of Induction Impacts Transplant Outcomes in Hodgkin Lymphoma Revealed Through A Longitudinal Nationwide Registry in Taiwan
Source: Research Square preprint supplement (doi:10.21203/rs.3.rs-6869381/v1), 2025-06-17
Supplement: Supplementary file 1 [file 3d198edc243b47ed3e647f68.docx]

**Table 1**: Baseline characteristics of total population, stratified by early failure of induction (EFI).

|  | non-EFI | EFI | Overall | *p* value |
| --- | --- | --- | --- | --- |
| n | 127 | 111 | 238a |  |
| Age | 29 [24, 36] | 27 [21, 41] | 28 [23, 37] | 0.322 |
| Male | 66 (52.0) | 65 (58.6) | 131 (55.0) | 0.361 |
| Ann Arbor staging |  |  |  | 0.662 |
| Stage I | 5 (4.0) | 4 (3.6) | 9 (3.8) |  |
| Stage II | 53 (42.1) | 39 (35.1) | 92 (38.8) |  |
| Stage III | 24 (19.0) | 21 (18.9) | 45 (19.0) |  |
| Stage IV | 44 (34.9) | 47 (42.3) | 91 (38.4) |  |
| Histology subtype (n = 198) |  |  |  | 0.316a |
| Nodular sclerosis | 78 (72.2) | 69 (79.3) | 147 (75.4) |  |
| Mixed cellularity | 23 (21.3) | 13 (14.9) | 36 (18.5) |  |
| Lymphocyte-rich | 7 (6.5) | 1 (1.1) | 8 (4.1) |  |
| Lymphocyte-depleted | 0 (0.0) | 4 (4.6) | 4 (2.1) |  |
| Diagnosed after 2016 | 27 (21.4) | 38 (34.2) | 65 (27.4) | **0.03** |
| IPS score > 2 (n = 149) | 23 (34.3) | 42 (51.9) | 65 (43.9) | **0.046** |
| CCI > 2 | 22 (17.3) | 21 (18.9) | 43 (18.1) | 0.866 |
| First line therapy |  |  |  | 0.655 |
| ABVD | 107 (84.3) | 103 (92.8) | 210 (88.2) |  |
| COMP/ABVD | 7 (5.5) | 4 (3.6) | 11 (4.6) |  |
| Others | 13 (10.2) | 4 (3.6) | 15 (6.3) |  |
| BV use | 31 (24.4) | 32 (28.8) | 63 (26.5) | 0.464 |
| Previous BV before HSCT | 17 (13.4) | 18 (16.2) | 35 (14.7) | 0.585 |
| Post-transplantation BV | 22 (17.3) | 21 (18.9) | 43 (18.1) | 0.866 |
| ICI use | 5 (3.9) | 7 (6.3) | 12 (5.0) | 0.555 |
| Previous ICI before HSCT | 3 (2.4) | 2 (1.8) | 5 (2.1) | >0.999 |
| Disease status at HSCT |  |  |  |  |
| CR | 52 (42.3) | 37 (33.9) | 89 (38.4) | 0.29 |
| Chemosensitive PR | 57 (46.3) | 51 (46.8) | 108 (46.6) |  |
| Chemorefractory PR | 6 (4.9) | 7 (6.4) | 13 (5.6) |  |
| Refractory | 8 (6.5) | 14 (12.8) | 22 (9.5) |  |
| 1st transplantation (ASCT) |  |  |  |  |
| Stem cell source - PB | 125 (98.4) | 110 (99.1) | 235 (98.7) | >0.999 |
| Conditioning regimen |  |  |  | 0.484 |
| BEAM-based | 86 (68.8) | 68 (61.3) | 154 (65.3) |  |
| GemBuMel-based | 12 (9.6) | 13 (11.7) | 25 (10.6) |  |
| Others | 27 (21.6) | 30 (27.0) | 57 (24.2) |  |
| 2nd transplantation (n = 27) | 15 (11.8) | 12 (10.8) | 27 (11.3) | 0.841 |
| 2nd transplantation due to R/R | 13 (86.7) | 10 (83.3) | 23 (85.2) | >0.999 |
| HSCT type |  |  |  | >0.999 |
| ASCT | 5 (33.3) | 4 (33.3) | 9 (33.3) |  |
| Allo-SCT | 10 (66.7) | 8 (66.6) | 18 (66.6) |  |

aComparison between nodular sclerosis (NS) and non-NS groups

Abbreviations: ABVD: doxorubicin, bleomycin, vinblastine, and dacarbazine; Allo-SCT: allogeneic stem cell transplantation; ASCT: autologous stem cell transplantation; BEAM: carmustine, etoposide, cytarabine and melphalan; BV: brentuximab vedotin; CCI: Charlson comorbidity index; COMP: cyclophosphamide, vincristine, methotrexate and prednisolone; CR: complete response; GemBuMel: gemcitabine, busulfan and melphalan; ICI, Immune checkpoint inhibitor; IPS: International prognostic score; PB: peripheral blood; PR: partial response; R/R: relapsed or refractory.

**Table 2:** Univariable and Multivariable Cox Regression Analysis for Risk Factors

| Factor | Univariable | | Multivariable | |
| --- | --- | --- | --- | --- |
| **HR (95% CI)** | ***p* value** | **HR (95% CI)** | ***p* value** | |
| Age | 1.04 (1.01–1.06) | **0.003** |  |  | |
| CCI >2 | 3.40 (1.66–6.95) | **0.001** | 3.40 (1.63–7.09) | **0.001** | |
| Male | 1.29 (0.64–2.60) | 0.47 |  |  | |
| B symptoms | 1.27 (0.63–2.58) | 0.5 |  |  | |
| CD34+ stem cell dose | 0.97 (0.91–1.04) | 0.46 |  |  | |
| IPS >2 | 1.04 (0.45–2.43) | 0.93 |  |  | |
| Ann Arbor stage 3, 4 | 1.71 (0.83–3.54) | 0.15 | 1.56 (0.74–3.35) | 0.24 | |
| Pretransplantation disease status |  |  |  |  | |
| CR | Reference |  | Reference |  | |
| Chemosensitive PR | 1.65 (0.73–3.73) | 0.23 | 1.37 (0.60–3.14) | 0.45 | |
| Chemoresistance PR | 3.44 (0.92–12.94) | 0.066 | 3.94 (1.03–15.02) | **0.044** | |
| Refractory | 2.79 (0.93–8.35) | 0.066 | 2.11 (0.70–3.14) | 0.19 | |
| Conditioning regimen |  |  |  |  | |
| BEAM-based | Reference |  |  |  | |
| GBM-based | 0.70 (0.16–2.98) | 0.63 |  |  | |
| Others | 1.23 (0.56–2.67) | 0.61 |  |  | |
| EFI | 2.38 (1.18–4.77) | **0.015** | 2.21 (1.07–4.58) | **0.032** | |
| Post-transplantation BV consolidation | 0.89 (0.34–2.32) | 0.82 |  |  | |

Abbreviations: BEAM: carmustine, etoposide, cytarabine and melphalan; BV: brentuximab vedotin; CCI: Charlson comorbidity index; CR: complete response; EFI: early failure of induction; GemBuMel: gemcitabine, busulfan and melphalan; IPS: International prognostic score; PR: partial response.

**Table 3:** Comparison between baseline characteristics before and after propensity score matching (PSM) and inverse probability treatment weighting (IPTW) adjustments.

|  | **Unadjusted** | | | | **PSM** | | | | **IPTW** | | | |
| --- | --- | --- | --- | --- | --- | --- | --- | --- | --- | --- | --- | --- |
|  | **Non-EFI** | **EFI** | ***p*** | **SMD** | **Non-EFI** | **EFI** | ***p*** | **SMD** | **Non-EFI** | **EFI** | ***p*** | **SMD** |
| **n** | **127** | **111** |  |  | **51** | **51** |  |  | **110** | **113** |  |  |
| **Age** | 29 [24, 36] | 27 [21, 41] | 0.322 | 0.155 | 29 [25, 34] | 27 [22, 39] | 0.451 | 0.009 | 29 [24, 36] | 27 [22, 38] | 0.628 | 0.012 |
| **Male** | 66 (52.0) | 65 (58.6) | 0.361 | 0.192 | 27 (52.9) | 34 (66.7) | 0.225 | 0.137 | 66.2 (60.7) | 70.3 (62.3) | 0.877 | 0.016 |
| **CCI>2** | 22 (17.3) | 21 (18.9) | 0.866 | 0.092 | 7 (13.7) | 9 (17.6) | 0.786 | 0.039 | 17.3 (15.9) | 20.5 (18.2) | 0.761 | 0.023 |
| **Diagnosed after 2016** | 27 (21.4) | 38 (34.2) | **0.03** | 0.171 | 8 (15.7) | 13 (25.5) | 0.327 | 0.098 | 28.0 (25.7) | 28.4 (25.2) | 0.961 | 0.005 |
| **Ann Arbor stage III/IV** | 68 (54.0) | 68 (61.3) | 0.293 | 0.064 | 26 (51.0) | 27 (52.9) | >0.99 | 0.020 | 55.5 (50.9) | 60.7 (53.8) | 0.776 | 0.029 |
| **Nodular sclerosis** | 78 (72.2) | 69 (79.3) | 0.316 | 0.061 | 37 (72.5) | 39 (76.5) | 0.821 | 0.039 | 80.2 (73.5) | 84.4 (74.8) | 0.889 | 0.013 |
| **IPS > 2** | 23 (34.3) | 42 (51.9) | **0.046** | 0.178 | 16 (31.4) | 20 (39.2) | 0.535 | 0.078 | 43.6 (39.9) | 47.1 (41.8) | 0.858 | 0.018 |
| **Previous BV before HSCT** | 17 (13.4) | 18 (16.2) | 0.585 | 0.033 | 5  (9.8) | 7 (13.7) | 0.76 | 0.039 | 12.5 (11.5) | 12.8 (11.4) | 0.988 | 0.001 |
| **Disease status at HSCT** |  |  | 0.185 |  |  |  | 0.732 |  |  |  | 0.89 |  |
| **CR** | 52 (42.3) | 37 (33.9) |  | 0.090 | 23 (45.1) | 21 (41.2) |  | 0.039 | 47.2 (43.2) | 46.8 (41.5) |  | 0.017 |
| **Chemosensitive PR** | 57 (46.3) | 51 (46.8) |  | 0.025 | 23 (45.1) | 22 (43.1) |  | 0.020 | 48.9 (44.8) | 48.6 (43.1) |  | 0.017 |
| **Othersa** | 14 (11.4) | 21 (19.3) |  | 0.115 | 5  (9.8) | 8 (15.7) |  | 0.059 | 13.1 (12.0) | 17.3 (15.3) |  | 0.034 |

aOthers includes chemoresistance-PR and refractory disease and were combined due to the small sample size.

Abbreviations: BV: brentuximab vedotin; CCI: Charlson comorbidity index; CR: complete response; EFI: early failure of induction; IPS: International prognostic score; IPTW: inverse probability of treatment weighting; PR: partial response; PSM: propensity score matching; SMD: standardized mean difference.
