# Supplementary material for: Early Failure of Induction Impacts Transplant Outcomes in Hodgkin Lymphoma Revealed Through A Longitudinal Nationwide Registry in Taiwan
Source: Research Square preprint supplement (doi:10.21203/rs.3.rs-6869381/v1), 2025-06-17
Supplement: Supplementary file 2 [file cf20c06e4c39168a5ac64e13.docx]

**Supplementary Figures**

**Supplementary Figure 1**: Schematic representation of early failure of induction (EFI) therapy and failure of induction (FI) duration definition.


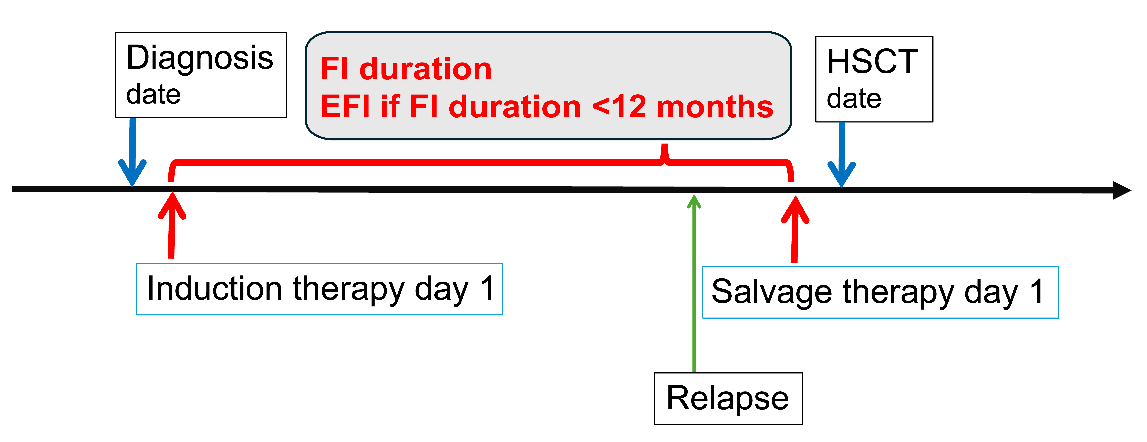


Abbreviations: EFI: early failure of induction; FI duration: failure of induction duration; HSCT: hematopoietic stem cell transplantation.

**Supplementary Figure 2**: **CONSORT diagram of study flow**


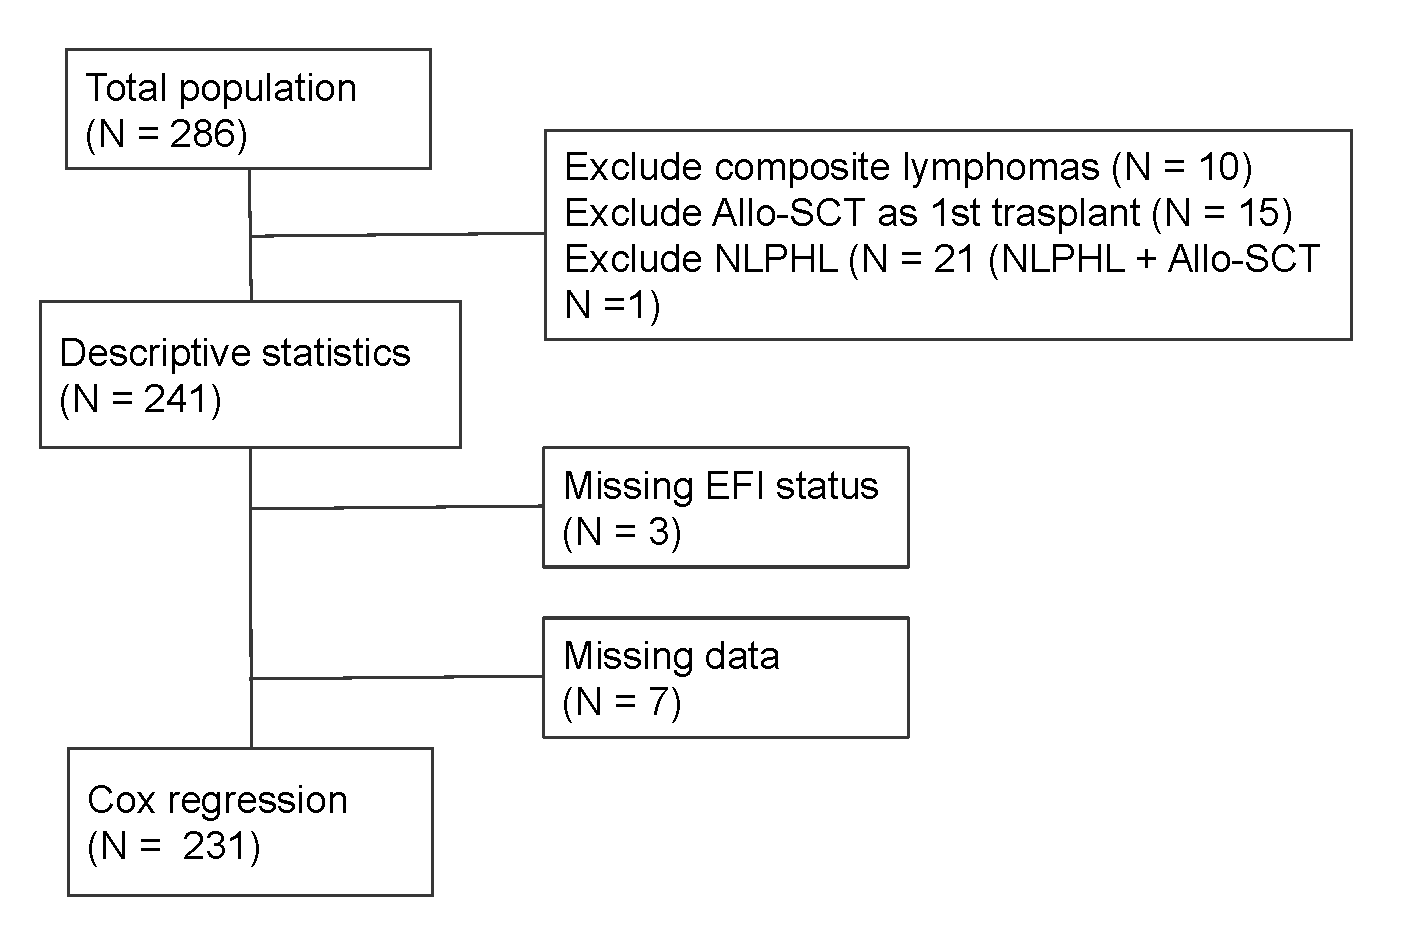


**Supplementary Figure 3**: Therapy approaches used in second-line settings
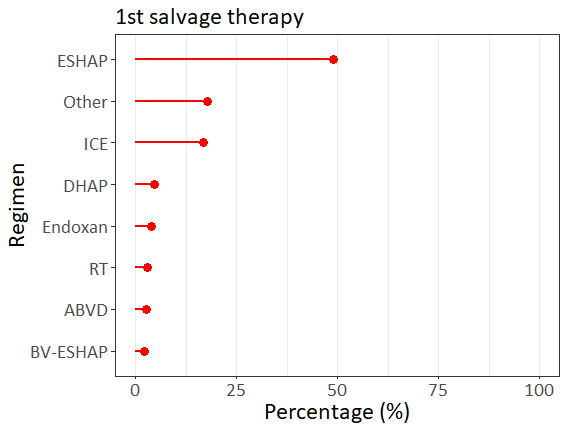


**Supplementary Figure 4:** Cycles of post-transplantation in patients (n = 35) who received BV consolidation.


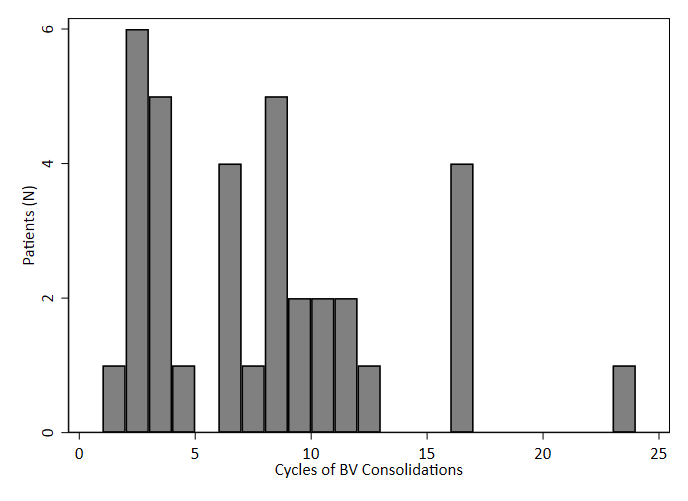


**Supplementary Figure 5:** Kaplan–Meier estimates of survival in post-transplantation relapse stratified by early failure of induction (EFI) status.

**
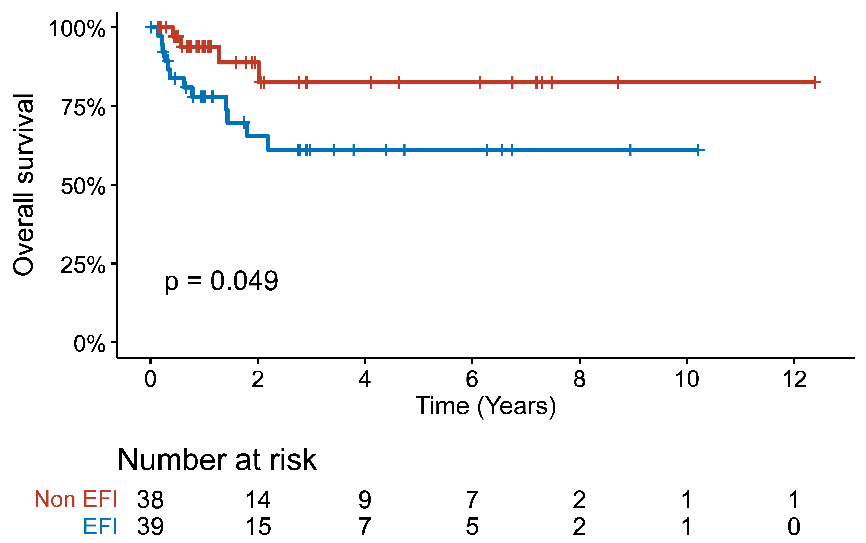
**

**Supplementary Figure 6:** Love plot before and after propensity score matching (PSM) and inverse probability treatment weighting (IPTW) among characteristics.


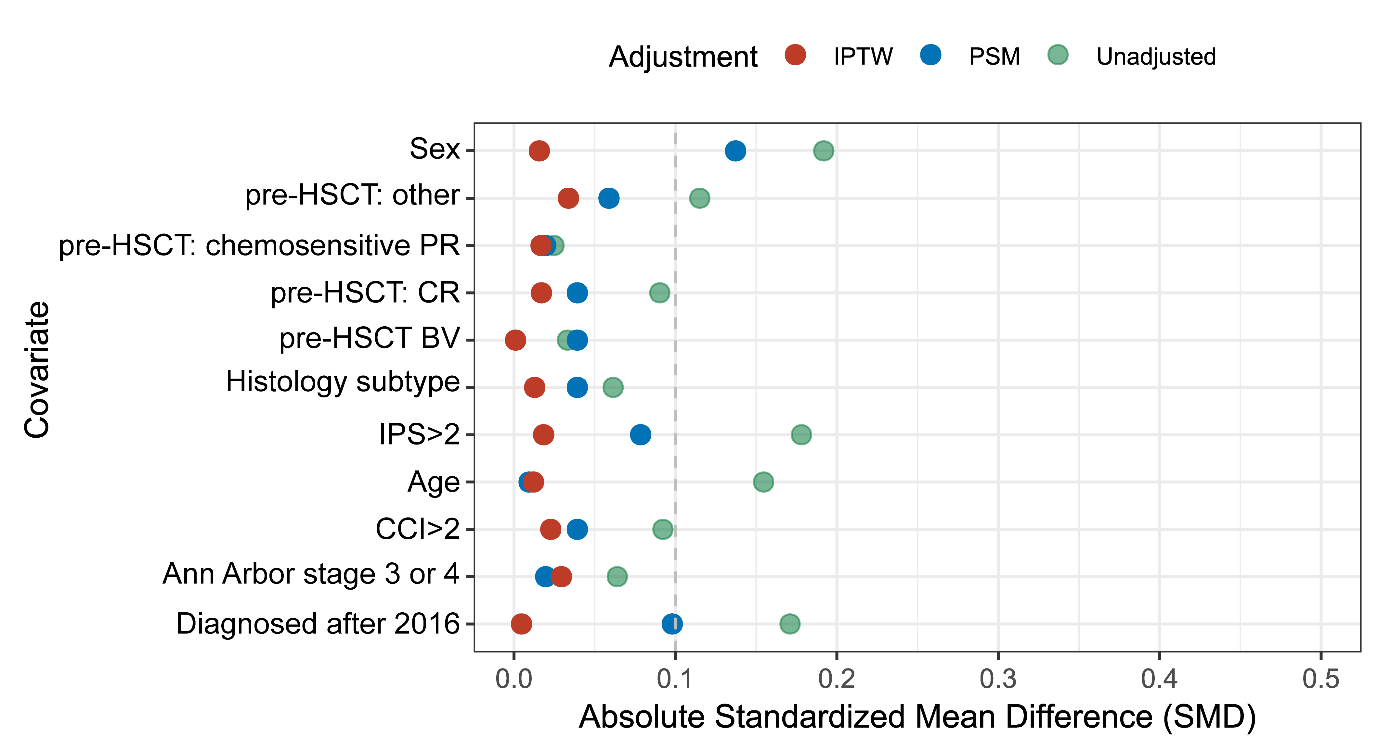


**Supplementary Figure 7:** Performance comparison of Cox proportional hazards models using linear and restricted cubic splines with varying knots for early failure of induction (EFI).


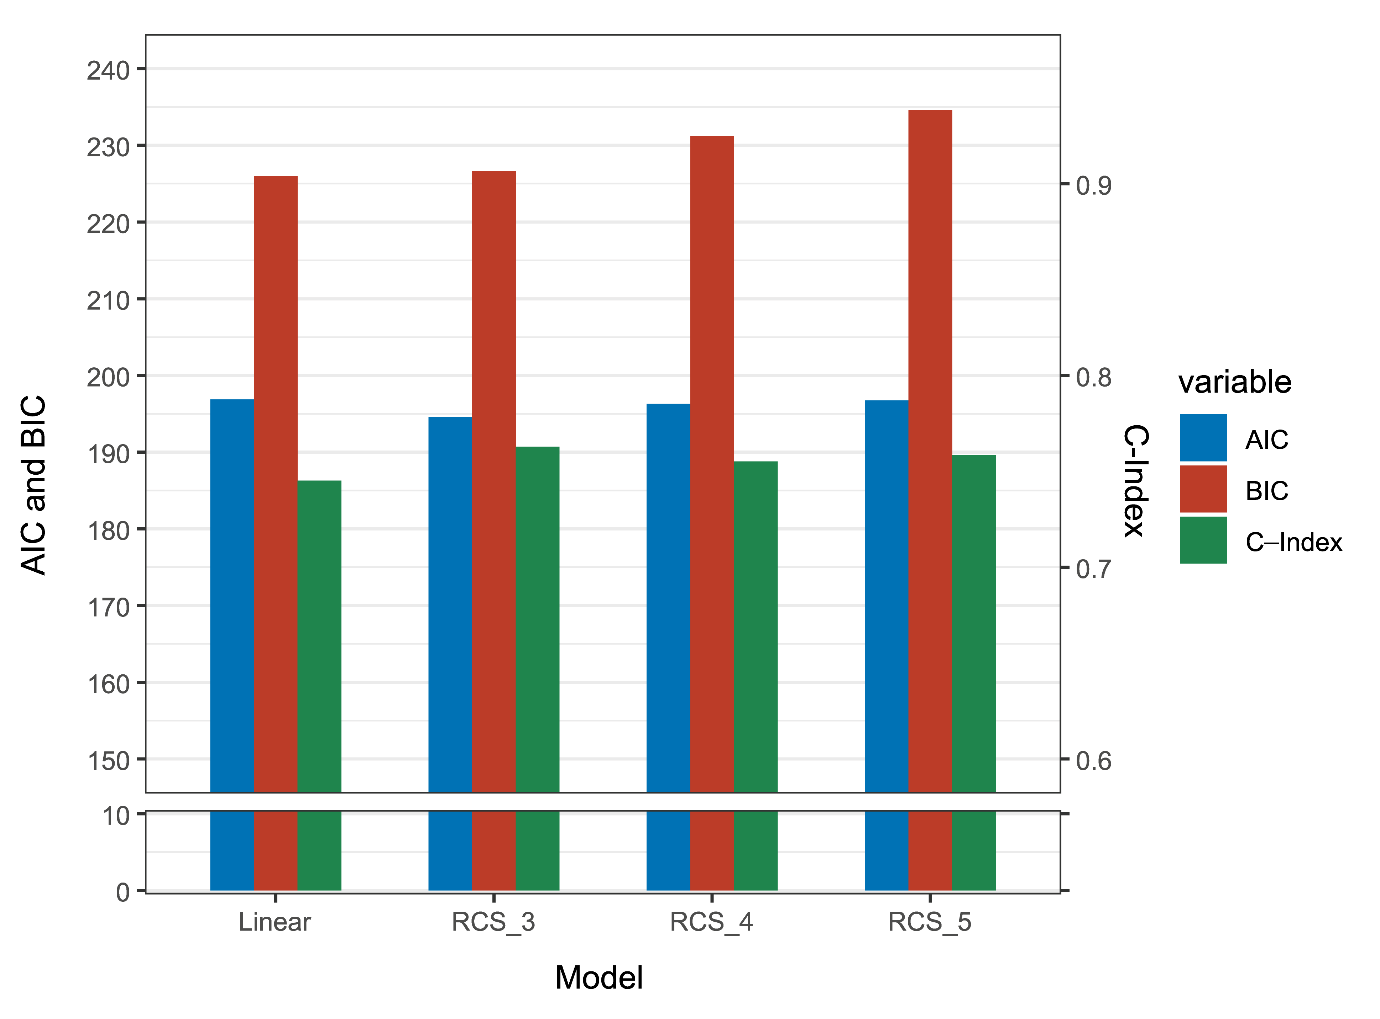


Abbreviations: Abbreviations: AIC: Akaike information criterion; BIC: Bayesian Information Criterion; C-index: concordance index; RCS: Restricted cubic splines.

**Supplementary Table**

**Supplementary Table 1:** Performance comparison of Cox proportional hazards models using linear and restricted cubic splines with varying knots for early failure of induction (EFI)."

| Model | AIC | BIC | C-index |
| --- | --- | --- | --- |
| Linear | 196.9 | 226.0 | 0.745 |
| RCS with 3 knots | 194.6 | 226.6 | 0.763 |
| RCS with 4 knots | 196.3 | 231.2 | 0.755 |
| RCS with 5 knots | 196.7 | 234.6 | 0.758 |

Abbreviations: AIC: Akaike information criterion; BIC: Bayesian Information Criterion; C-index: concordance index; RCS: Restricted cubic splines.
